# Supplementary material for: Teaching Motivation as Predictors of Relationship Teaching Efficacy and Innovative Teaching Behaviour among Primary School Dance Teachers in Hebei Province, China
Source: Research Square preprint supplement (doi:10.21203/rs.3.rs-8351278/v1), 2026-02-17
Supplement: Supplementary file 1 [file fd2bd9b35c8938627635b2cc.docx]

**Innovative Teaching Behaviour Scale (Adapted from Zhang, 2004))**

| **Dimension** | **Items** |
| --- | --- |
| **Guidance of Learning Methods** | 1. Students in my class have opportunities to engage in group activities regularly. |
| 1. I leave dance learning issues for my students to solve on their own. |
| 1. I encourage my students to offer their ideas and suggestions in dance learning. |
| 1. I teach students fundamental dance knowledge and leave space for individual learning. |
| 1. I pose open-ended questions to students, allowing them to seek their own answers. |
| 1. Dance learning sessions require group collaboration among students in our class. |
| **Motivation Stimulation** | 1. In my dance classes, I emphasize the importance of mastering basic knowledge and skills. |
| 1. I stress the importance of acquiring fundamental dance knowledge and skills. |
| 1. I appreciate it when my students apply the dance knowledge they have learned to different purposes. |
| 1. My students know that I expect them to master the basics of dance. |
| 1. I encourage my students to do different things with what they learn in dance classes. |
| 1. I do not mind my students trying out their ideas in dance, even if they deviate from what I have shown them. |
| **Evaluation of Perspectives** | 1. When my students have ideas about dance learning, I allow them to explore further before I begin my lecture. |
| 1. I follow up on students’ suggestions to show that I take them seriously. |
| 1. I provide opportunities for my students to share their strengths and weaknesses with the whole class. |
| 1. My students know that I expect them to check their dance homework before me. |
| 1. My students know that I do not disregard their suggestions. |
| 1. I only comment on students' dance learning ideas after deeper discussion. |
| 1. In my dance classes, students have the opportunity to judge whether they are right or wrong. |
| 1. I listen to students' suggestions, even if they are not useful. |
| 1. When my students ask dance-related questions that seem silly, I listen patiently. |
| **Encouragement of Flexibility** | 1. In my dance classes, students have the opportunity to share ideas and perspectives. |
| 1. I encourage my students to think from different perspectives, even if some ideas might not work. |
| 1. I help my students learn from their failures. |
| 1. I appreciate my students spending time thinking in different ways. |
| 1. I encourage frustrated students to see setbacks as part of the learning process. |
| 1. I encourage students to do different things, even though it takes more time. |
| 1. I encourage students who have experienced failure to seek other possible solutions. |

**Teaching Efficacy Scale (Adapted from Hu, 2022))**

| Dimension | Items |
| --- | --- |
| Classroom Management | 1. When students are confused, I guide them to solve the problem. |
| 1. I can quiet students who display disruptive classroom behaviors. |
| 1. I believe dance teachers play a significant role in societal development. |
| 1. I adjust my teaching strategies based on classroom situations. |
| 1. I proactively anticipate potential disruptions and have plans to address them. |
| 1. I utilize class time efficiently to maximize student learning outcomes. |
| Instructional Strategies | 1. I am actively adapting to new teaching models. |
| 1. I explain the connections between new and old knowledge. |
| 1. I can diligently complete my daily dance teaching tasks. |
| 1. I employ a variety of assessment strategies. |
| 1. I integrate technology to enhance dance instruction and student learning. |
| 1. I provide differentiated instruction to cater to the diverse learning needs of my students. |
| Student Engagement | 1. I explain what I expect students to learn in dance. |
| 1. I am willing to offer help if students need it. |
| 1. I strive to create a positive learning atmosphere for students. |
| 1. I encourage students to come up with solutions through questioning. |
| 1. I actively seek to understand students' interests and motivations to tailor engagement strategies. |
| 1. I use interactive activities that encourage students to actively participate and engage with the content in learn dance. |

**Teaching Motivation Scale (Adapted from Ding, (2015))**

| Dimension | Items |
| --- | --- |
| Intrinsic Motivation | 1. Engaging in dance teaching is very important to me. |
| 1. Dance teaching is enjoyable. |
| 1. The school mandates that I engage in dance teaching. |
| 1. Dance teaching brings me pleasure. |
| 1. This job allows me to achieve work goals that I consider important. |
| 1. I would feel guilty if I were not engaged in dance teaching. |
| 1. I once knew the reasons for engaging in dance teaching, but now I am unclear. |
| Extrinsic Motivation | 1. I find that dance teaching has a significant relationship with students' academic success. |
| 1. The requirements of my teaching job compel me to engage in dance-related activities. |
| 1. I often fail to see the accomplishments associated with dance teaching. |
| 1. This job provides me with a higher salary. |
| 1. I enjoy this job. |
| 1. I would feel very bad if I were not engaged in dance teaching. |
| 1. Sometimes I feel uncertain about the purpose of engaging in dance teaching. |
